# Supplementary material for: Induction of cellulase production in Trichoderma reesei by a glucose–sophorose mixture as an inducer prepared using stevioside
Source: Royal Society of Chemistry journal article supplement (doi:10.1039/d2ra01192a), 2022-01-01

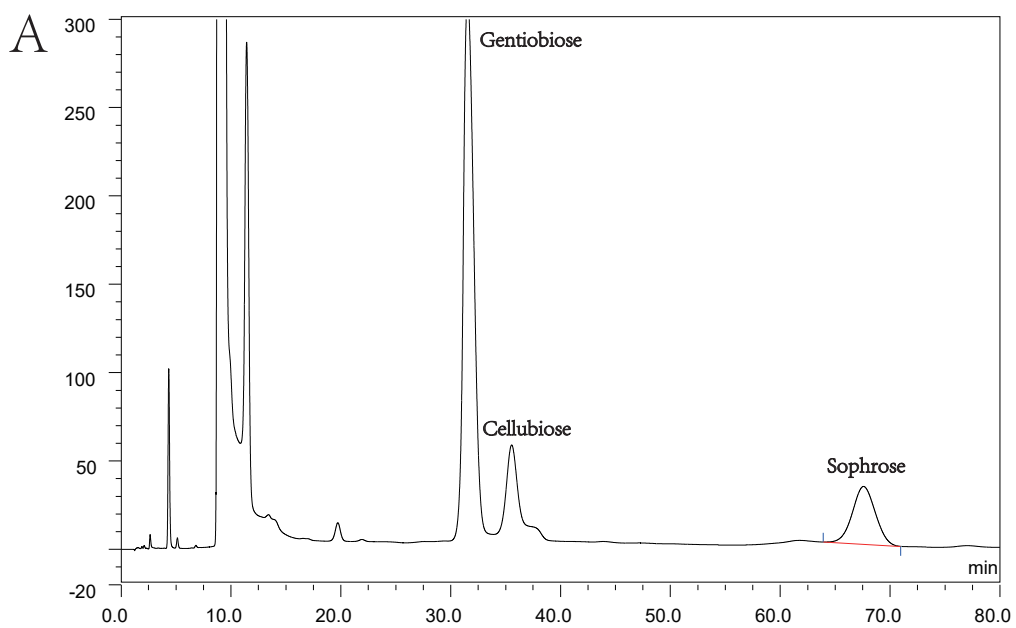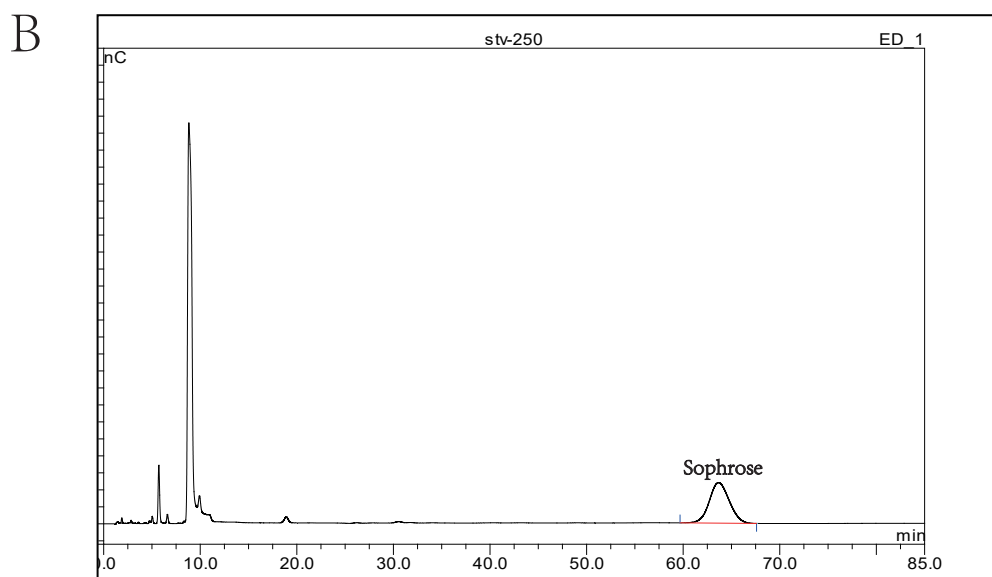

Supplement: d2ra01192a1.pdf [file d2ra01192a1.pdf]
